# Supplementary material
Source: PubMed Central journal article supplement (PMC4172367)
Supplement: NIHMS60218-supplement-Supp_legends.pdf [file NIHMS60218-supplement-Supp_legends.pdf]

**Supplemental Figure 1.** (A) Dose-response curves of JQ1 in match CD133+ and CD133- cells enriched from the T4105 or T4597 primary glioblastoma xenograft lines. (B) Growth rates of T4302 CD133+ cells for 5 days were measured in the presence of JQ1 at indicated concentrations. (C) Dose-response curve of (-)-JQ1 in T4302 CD133+ cells. (D) Dose-response curve of PFI-1 in T4302 CD133+ cells. (E) T4302 CD133+ cells were treated by JQ1 for 72 hours at indicated concentrations. Relative caspase 3/7 activity was determined by normalizing caspase activities to the corresponding cell titers. \*:  $p < 0.05$  by student's *t*-test.

**Supplemental Figure 2.** (A) Normal human neural progenitor (NHNP) cells were treated with JQ1 at various concentrations as indicated. Five days after treatment, cell viability was determined by the CellTiter-Glo assay kit and normalized to the values of vehicle-treated cells. (B) Three days after JQ1 treatment, caspase activity was determined as described in Figure 2B. \*:  $p < 0.05$  by student's *t*-test. (C) Cell cycle distribution of NHNP cells was determined 48 hours after JQ1 treatment as described in Figure 1D.

**Supplemental Figure 3.** (A) Reduced expression of BRD2, BRD3, BRD4 following expression of corresponding shRNA sequences was determined by qRT-PCR in T4302 CD133+ cells. Cell growth was measured for 5 days following knockdown of (B) BRD2, (C) BRD3, or (D) BRD4 in T4302 CD133+ cells as described in Figure 2A.

**Supplemental Figure 4.** Immunoblotting of c-Myc in (A) T4302 CD133+ cells or (B) T4302 CD133- cells treated with JQ1 for 24 hours at indicated concentrations.

**Supplemental Figure 5.** (A) T4302 CD133+ cells were infected with lentivirus directing expression of non-targeting (NT) shRNA or p53-specific shRNA. Downregulation of p53 was determined by immunoblotting 24 hours after JQ1 treatment. (B) Rb expression was determined by qRT-PCR in T4302 CD133+ cells expressing NT shRNA or Rb-specific shRNA. (C) Immunoblotting of Bcl-xL in T4302 CD133+ cells infected with control lentivirus or virus directing expression of Bcl-xL. (D) Immunoblotting of p21 in T4302 CD133+ cells expressing NT shRNA or p21-specific shRNA.

**Supplemental Figure 6.** (A) The relative growth rates of T4597 tumors were determined as the weekly fold increases in bioluminescence intensity of individual tumors. Data shown were the mean  $\pm$  SEM ( $n=10$ ). (B) The median bioluminescence intensities were generated from all 10 tumors in each arm. \*:  $p < 0.05$  by student's *t*-test.
