# Supplementary material
Source: PubMed Central journal article supplement (PMC4172367)
Supplement: NIHMS60218-supplement-Supp_table.pdf [file NIHMS60218-supplement-Supp_table.pdf]

| Gene name                | Forward primer             | Reverse primer              |
|--------------------------|----------------------------|-----------------------------|
| $\beta$ -actin           | 5'-TCGTGCGTGACATTAAGGA     | 5'-AGGAAGGAAGGCTGGAAGAG     |
| c-Myc                    | 5'-TCAAGAGGCGAACACACAAC    | 5'-GGCCTTTTCATTGTTTTCCA     |
| p21 <sup>CIP1/WAF1</sup> | 5'-GGCAGACCAGCATGACAGATT   | 5'-GCGGATTAGGGCTTCCTCTT     |
| Bcl2                     | 5'-CTGGTGGGAGCTTGCATCAC    | 5'-ACAGCCTGCAGCTTTGTTTC     |
| Bcl-xL                   | 5'-CATGGCAGCAGTAAAGCAAGCG  | 5'-AGGCTCTAGGTGGTCATTCAGG   |
| hTERT                    | 5'-TCCACTCCCACATAGGAATAGTC | 5'-TCCTTCTCAGGGTCTCCACCT    |
| TP53                     | 5'-TCAACAAGATGTTTTGCCAACTG | 5'-ATGTGCTGTGACTGCTTGTAGATG |
| RB                       | 5'-CTTGCATGGCTCTCAGATTCAC  | 5'-AGAGGACAAGCAGATTCAAGGTG  |
| BRD2                     | 5'-GTGGTTCTCGGCGGTAAG      | 5'-ACACCCCGGATTACATACCC     |
| BRD3                     | 5'-GAAGGCCAACAGCACGAC      | 5'-CCCTCCTCCTCTTCCTCTGA     |
| BRD4                     | 5'-TCCTGACCATGAGGTGGTG     | 5'-CAAAGCGCATTTTCGAACAC     |

**Supplemental Table 1. Real-time PCR primers used in this study.**
