# Supplementary material
Source: PubMed Central journal article supplement (PMC4172367)

# Supplemental Figure 1

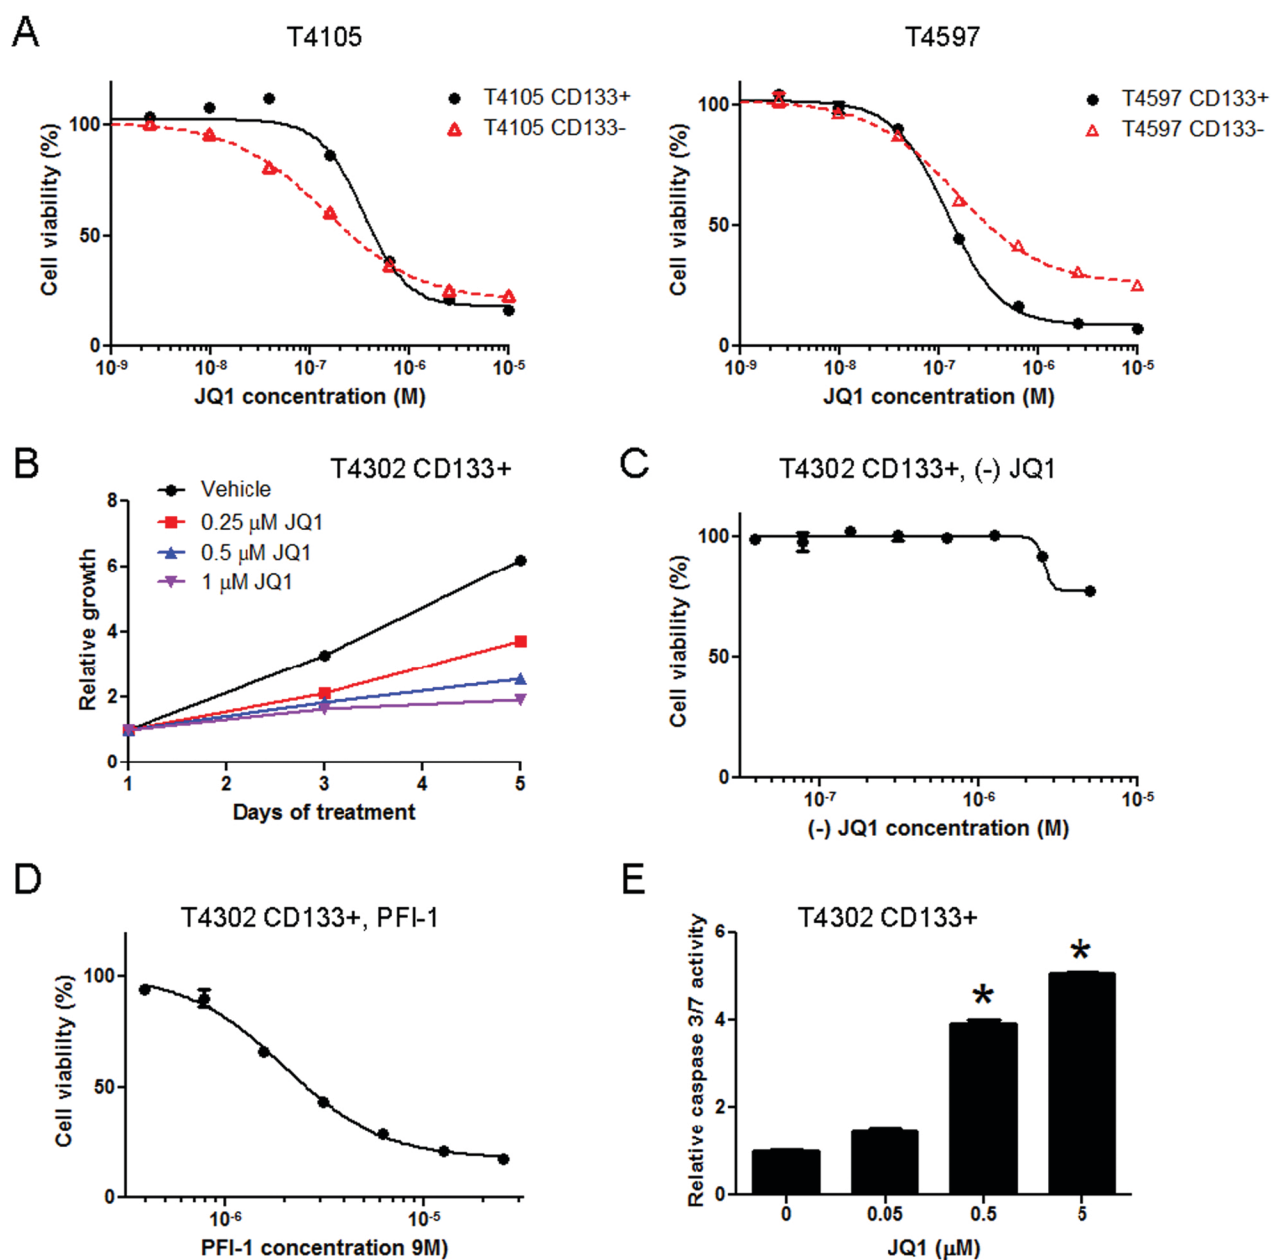

Supplement: NIHMS60218-supplement-Fig_S1.pdf [file NIHMS60218-supplement-Fig_S1.pdf]

## Supplemental Figure 2

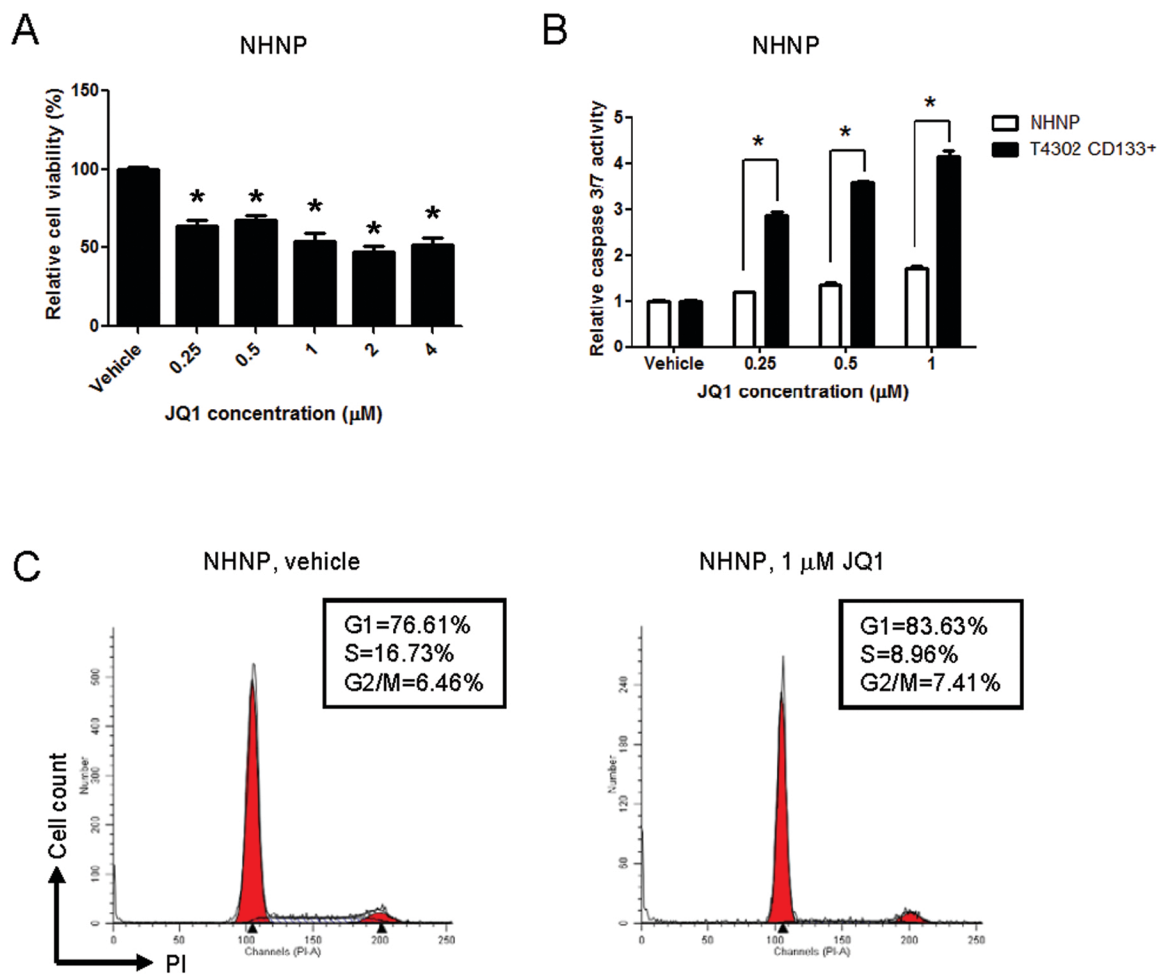

Supplement: NIHMS60218-supplement-Fig_S2.pdf [file NIHMS60218-supplement-Fig_S2.pdf]

# Supplemental Figure 3

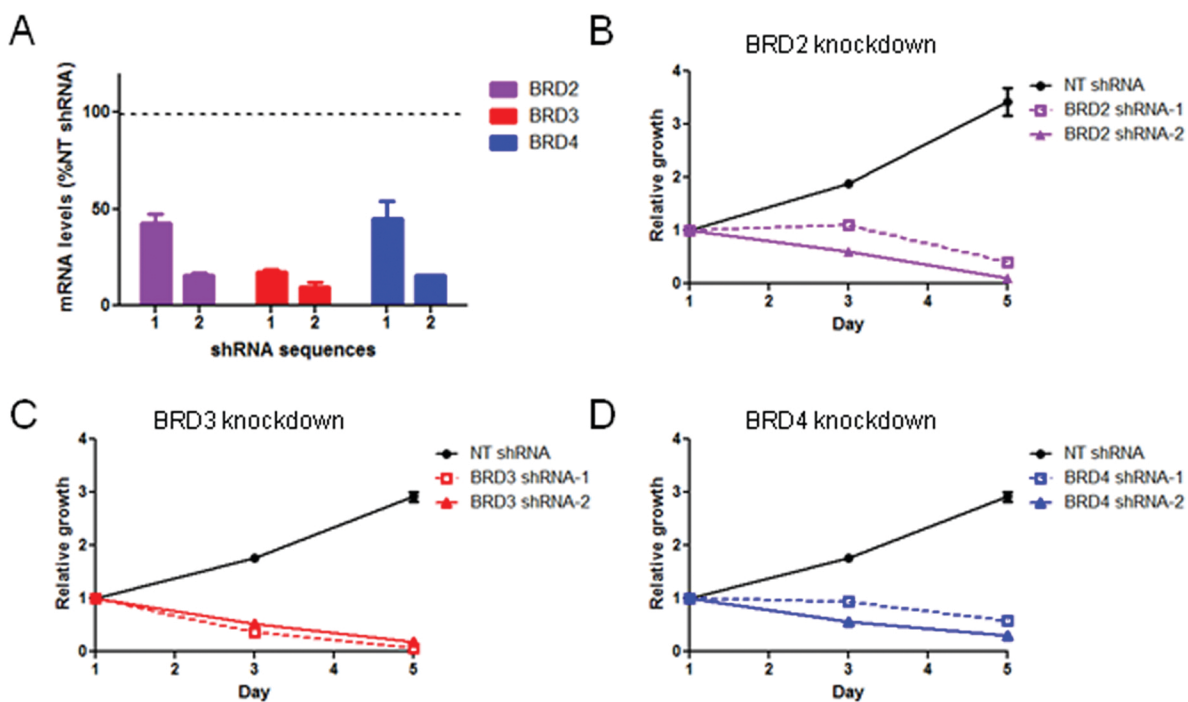

Supplement: NIHMS60218-supplement-Fig_S3.pdf [file NIHMS60218-supplement-Fig_S3.pdf]

## Supplemental Figure 4

**A**

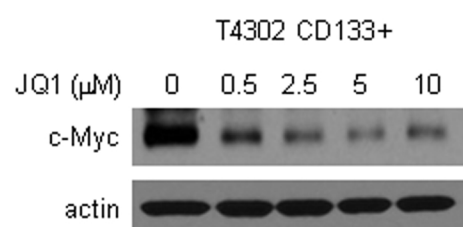

**B**

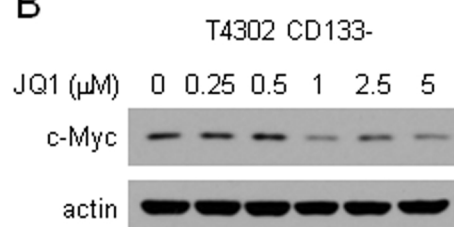

Supplement: NIHMS60218-supplement-Fig_S4.pdf [file NIHMS60218-supplement-Fig_S4.pdf]

## Supplemental Figure 5

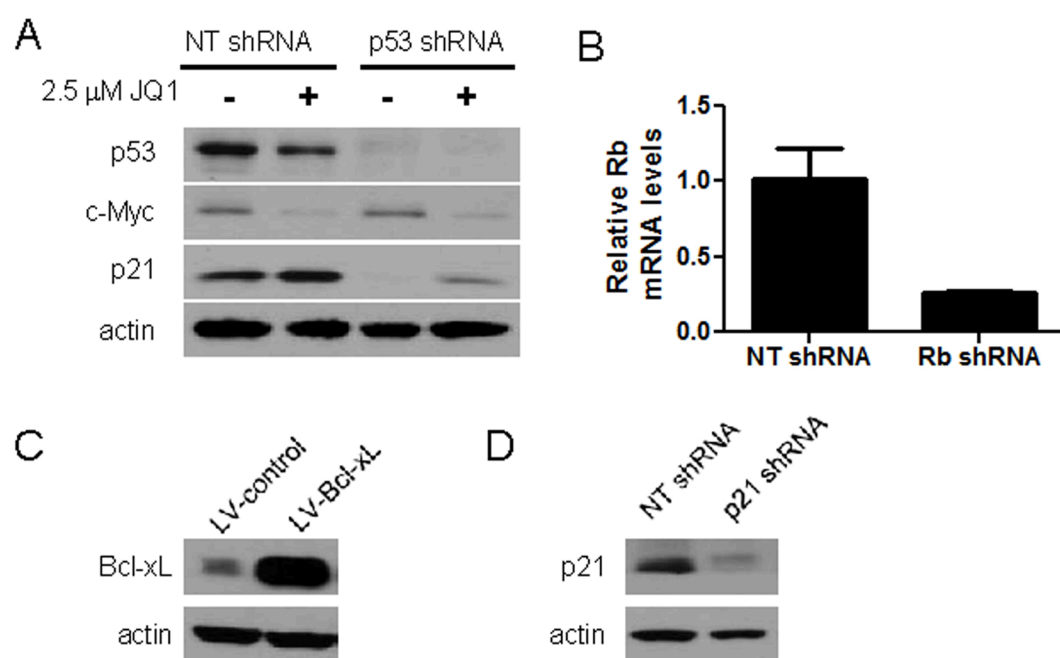

Supplement: NIHMS60218-supplement-Fig_S5.pdf [file NIHMS60218-supplement-Fig_S5.pdf]

# Supplemental Figure 6

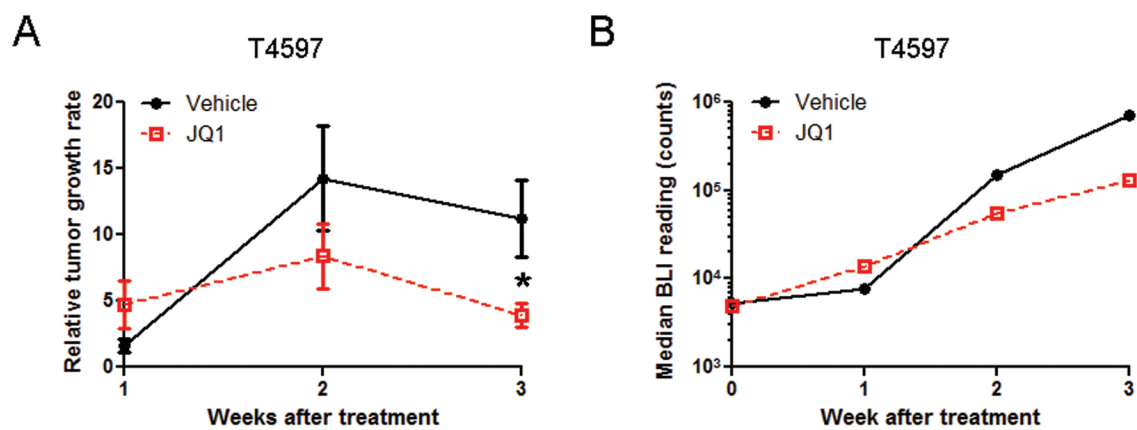

Supplement: NIHMS60218-supplement-Fig_S6.pdf [file NIHMS60218-supplement-Fig_S6.pdf]
